# Supplementary material for: Iron-catalyzed photoreduction of carbon dioxide to synthesis gas
Source: Royal Society of Chemistry journal article supplement (doi:10.1039/c5cy01129a), 2015-12-16
Supplement: c5cy01129a1.pdf [file c5cy01129a1.pdf]

## Supporting Information

for

### Iron-Catalyzed Photochemical Reduction of Carbon Dioxide to Synthesis Gas

Pamela G. Alsabeh,<sup>1,†</sup> Alonso Rosas-Hernández,<sup>1,†</sup> Enrico Barsch,<sup>1,2</sup> Henrik Junge,<sup>1</sup>  
Ralf Ludwig,<sup>1,2</sup> and Matthias Beller<sup>\*,1</sup>

<sup>1</sup> Leibniz Institute for Catalysis at the University of Rostock, Albert Einstein-Str. 29A, 18059 Rostock, Germany.

<sup>2</sup> Institute of Chemistry, Department Physical Chemistry, University of Rostock, Dr. Lorenz-Weg 1, 18059 Rostock, Germany.

Author email address: [matthias.beller@catalysis.de](mailto:matthias.beller@catalysis.de)

<sup>†</sup> These authors contributed to this work equally.

## Contents

|                                                                                                           |          |
|-----------------------------------------------------------------------------------------------------------|----------|
| 1. Details on the quantum yield calculations.....                                                         | Page S3  |
| 2. <b>Figure S1.</b> Measurement of incident photons at 440 nm.....                                       | Page S5  |
| 3. <b>Figure S2.</b> Measurement of incident photons at 415 nm.....                                       | Page S6  |
| 4. <b>Table S1.</b> Quantum yield measurements at 440 and 415 nm.....                                     | Page S7  |
| 5. Synthesis of [Fe(bpy)(CO) <sub>3</sub> ].....                                                          | Page S8  |
| 6. <b>Figure S3.</b> <sup>1</sup> H- and <sup>13</sup> C-NMR spectra for [Fe(bpy)(CO) <sub>3</sub> ]..... | Page S9  |
| 7. <b>Figure S4.</b> Operando FTIR measurements using [Fe <sub>3</sub> (CO) <sub>12</sub> ].....          | Page S10 |
| 8. <b>Figure S5</b> Operando FTIR measurements using [FeBr <sub>2</sub> ].....                            | Page S11 |
| 9. <b>Figure S6.</b> Operando FTIR measurements using [Fe(bpy)(CO) <sub>3</sub> ].....                    | Page S12 |

### Details on the quantum yield calculations

The quantum yields for the photocatalytic CO<sub>2</sub> reduction reactions were determined using the following equation:

$$QY(\%) = \frac{\text{products molecules} \times 2}{\text{incident photons}} \times 100\% \quad (1)$$

where the products molecules were quantified using a calibrated GC and the incident photons were measured using K<sub>3</sub>Fe(C<sub>2</sub>O<sub>4</sub>)<sub>3</sub><sup>1</sup> as chemical actinometer. Thus, 3mL (V<sub>1</sub>) of an aqueous solution containing the iron actinometer (0.15 M) and H<sub>2</sub>SO<sub>4</sub> (0.05 M) was irradiated with a high pressure Hg-lamp (Lumatec Superlite 400, 120W) equipped with built-in band pass filters, and using the same experimental setup as in the case of the photocatalytic reactions. The time of the irradiation was kept as short as possible to avoid more than 10% decomposition of the actinometer. Before each measurement, the power output of the Hg-lamp was measured using a thermopile (Fa. LOT Quantum Design). After irradiation, an aliquot of 0.180 mL (V<sub>2</sub>) was taken and 2 mL of a buffered solution of phenanthroline (0.015 M / 0.5 M H<sub>2</sub>SO<sub>4</sub>) were added together with distilled H<sub>2</sub>O to give a final volume of 25 mL (V<sub>3</sub>). The absorbance of the solution at 510 nm was recorded and the value was used to calculate the number of Fe<sup>2+</sup> ions (nFe<sup>2+</sup>) generated during the irradiation process through the following equation:

$$nFe^{2+} = \frac{V_1 \cdot V_3 \cdot (A - A_0)}{1000 \cdot V_2 \cdot \epsilon_0} \quad (2)$$

where

V<sub>1</sub> = volume of actinometer solution irradiated (mL)

V<sub>2</sub> = volume of aliquot taken for analysis (mL)

V<sub>3</sub> = final volume to which the aliquot V<sub>2</sub> is diluted (mL)

A = measured optical density at 510 nm

A<sub>0</sub> = measured optical density at 510 nm of a non-irradiated sample

ε<sub>0</sub> = experimental value of the molar extinction coefficient of the Fe<sup>2+</sup> complex (11100 L mol<sup>-1</sup> cm<sup>-1</sup>)

Finally, the number of incident photons per second (# photons) is calculated using the following equation:

$$\# \text{ photons } (s^{-1}) = \frac{6.022 \cdot 10^{23} \cdot nFe^{2+}}{\Phi_{\lambda} \cdot t} \quad (3)$$

where  $\Phi_{\lambda}$  = quantum yield of Fe<sup>2+</sup> formation

t = time of irradiation (s)

The number of incident photons were determined for 2 wavelengths (415 and 440 nm) using 3 different power outputs (0.07 W, 0.15 W, and 0.50 W).

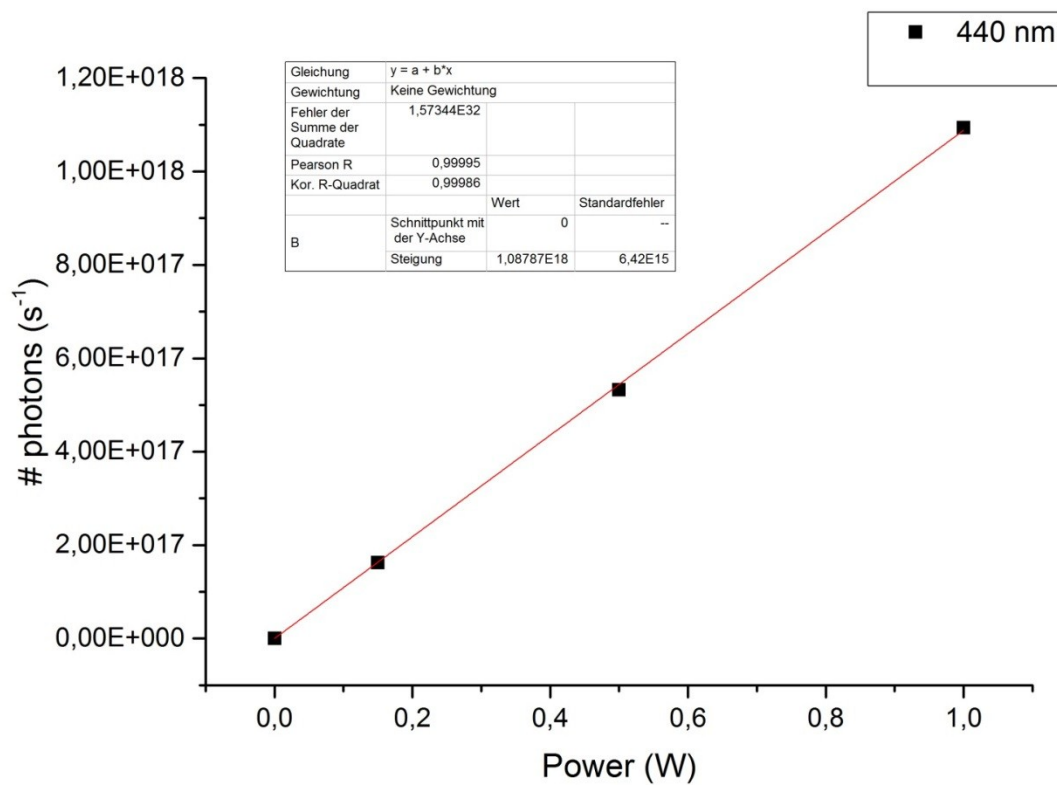

**Figure S1.** Measurement of incident photons at 440 nm using 3 different power outputs of the lamp.

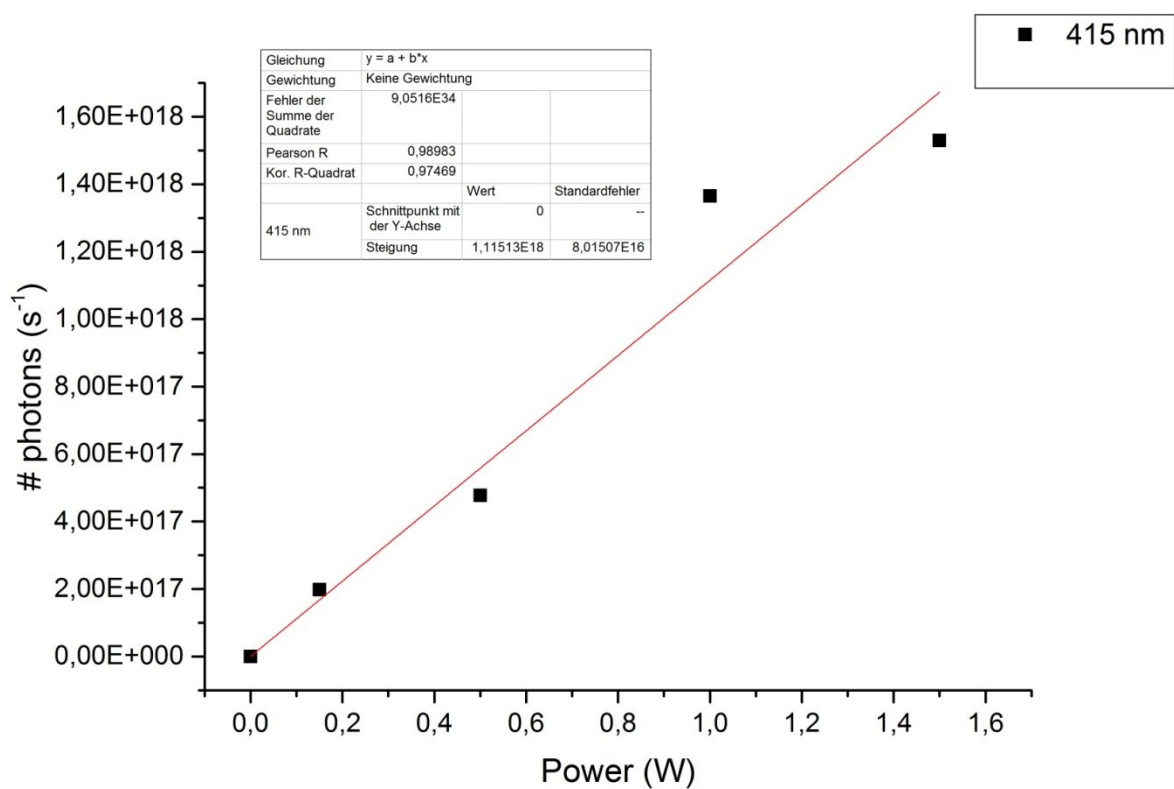

**Figure S2.** Measurement of incident photons at 415 nm using 4 different power outputs of the lamp.

| <b>PS</b>  | <b>Power (W)</b> | <b>Wavelength (nm)</b> | <b>H<sub>2</sub> (μmol)</b> | <b>CO (μmol)</b> | <b>Total (μmol)</b> | <b>Φ (%)</b> |
|------------|------------------|------------------------|-----------------------------|------------------|---------------------|--------------|
| <b>PS2</b> | 0.15             | 440                    | 51                          | 33               | 84                  | 4.3          |
| <b>PS1</b> | 0.15             | 440                    | 85                          | 105              | 190                 | 9.7          |
| <b>PS2</b> | 0.50             | 440                    | 54                          | 102              | 156                 | 2.4          |
| <b>PS1</b> | 0.50             | 440                    | 153                         | 188              | 341                 | 5.2          |
| <b>PS1</b> | 0.50             | 415                    | 134                         | 179              | 313                 | 4.7          |
| <b>PS1</b> | 0.07             | 440                    | 70                          | 68               | 138                 | 15.1         |

**Table S1.** Measurement of the quantum yield using photosensitizers **PS1** or **PS2** at 440 nm and 415 nm.

**Synthesis of [Fe(bpy)(CO)<sub>3</sub>]:** This complex was prepared based on a previously reported method.<sup>2</sup> 2,2'-bipyridine (87.47 mg, 0.56 mmol) was placed in 100 mL Schlenk tube and a solution of [Fe(CO)<sub>5</sub>] (200 mg, 1.02 mmol) in dioxane (15 mL) was added. The reaction mixture was heated to 95 °C for 26 h. The reaction vessel was quickly evacuated and refilled with Ar three times (after 1.5 h, 3.5 h and 18 h). The reaction mixture was allowed to reach room temperature, the insoluble residue was filtered off and washed with dioxane. The solutions were combined and all volatiles were removed in vacuo to obtain a dark green powder (116.06 mg, 70%). <sup>1</sup>H NMR (300 MHz, THF-d<sub>8</sub>): δ = 9.62 – 9.25 (m, 1H), 8.82 – 8.15 (m, 3H), 7.99 – 7.53 (m, 2H), 7.41 – 7.07 (m, 2H); <sup>13</sup>C NMR (75 MHz, THF-d<sub>8</sub>): δ = 121.32, 122.86, 123.43, 124.43, 132.02, 137.32, 149.89, 151.96, 154.53, 157.00, 221.78.



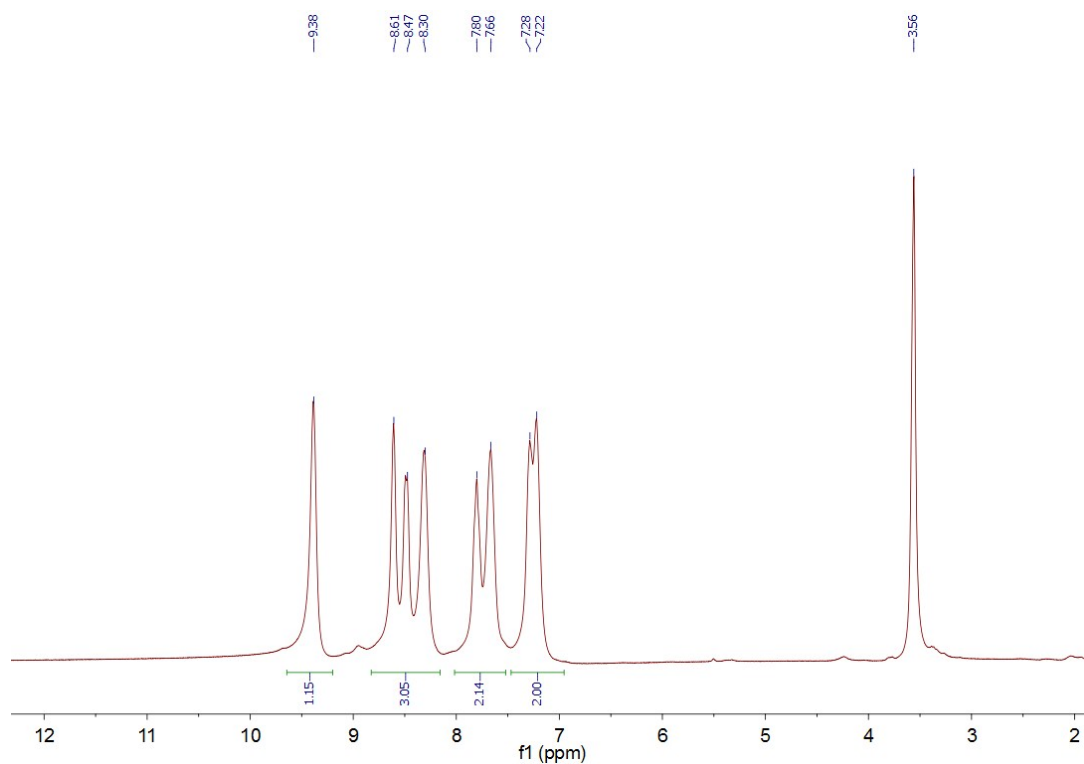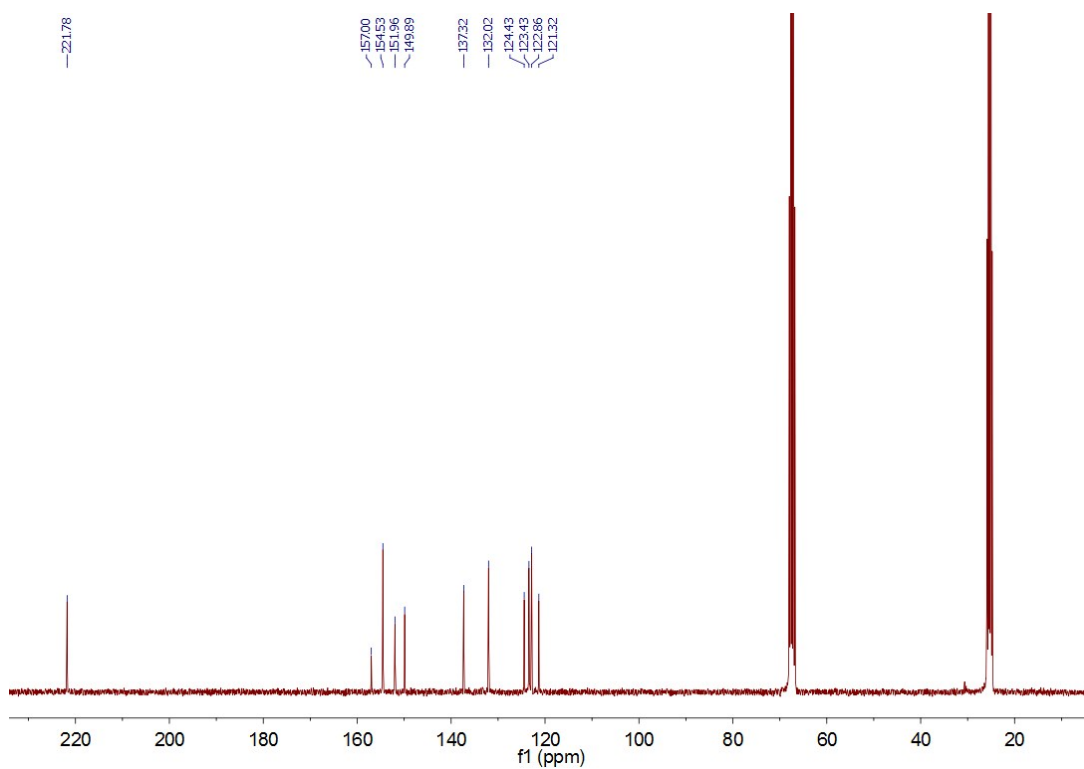

**Figure S3.**  $^1\text{H}$  NMR (top) and  $^{13}\text{C}$  NMR (bottom) spectra of  $[\text{Fe}(\text{bpy})(\text{CO})_3]$  measured in  $\text{THF-d}_8$ .

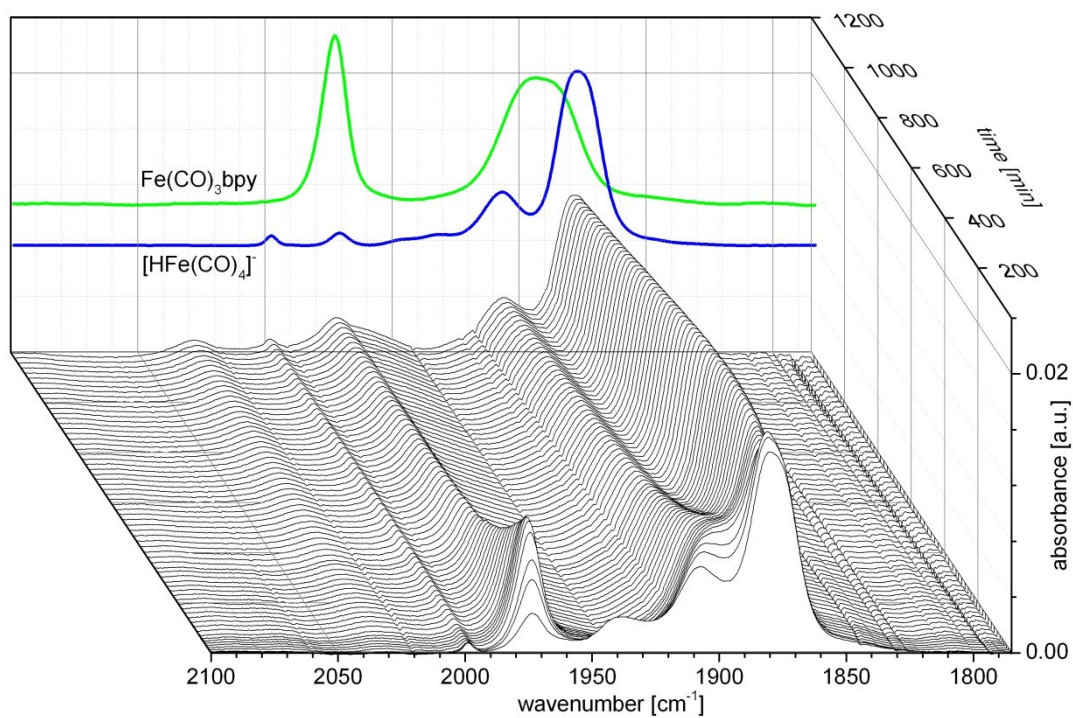

**Figure S4.** Operando FTIR spectra of a  $\text{CO}_2$ -saturated solution (NMP:TEOA = 5:1, v/v), containing  $[\text{Fe}_3(\text{CO})_{12}]$  (1  $\mu\text{mol}$ ),  $[\text{Ru}(\text{bpy})_3]\text{Cl}_2$  (25  $\mu\text{mol}$ ), and 2,2'-bipyridine (15  $\mu\text{mol}$ ) during irradiation with visible light (400-700 nm).

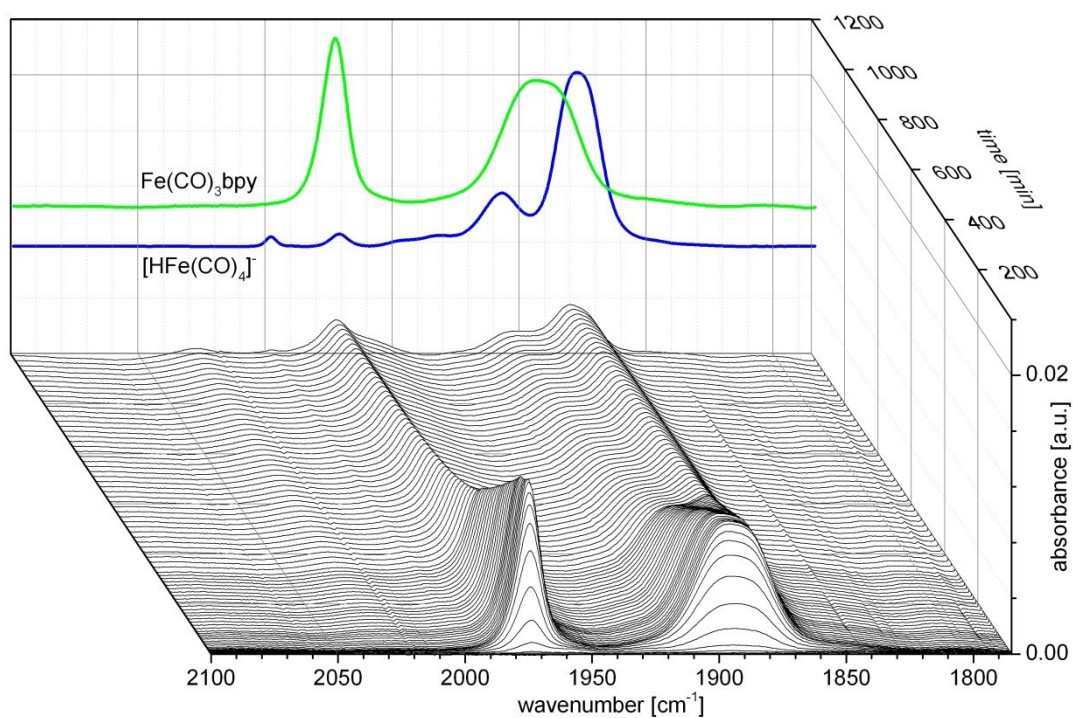

**Figure S5.** Operando FTIR spectra of a  $\text{CO}_2$ -saturated solution (NMP:TEOA = 5:1, v/v), containing  $[\text{FeBr}_2]$  ( $3 \mu\text{mol}$ ),  $[\text{Ru}(\text{bpy})_3]\text{Cl}_2$  ( $25 \mu\text{mol}$ ), and 2,2'-bipyridine ( $15 \mu\text{mol}$ ) during irradiation with visible light (400-700 nm).

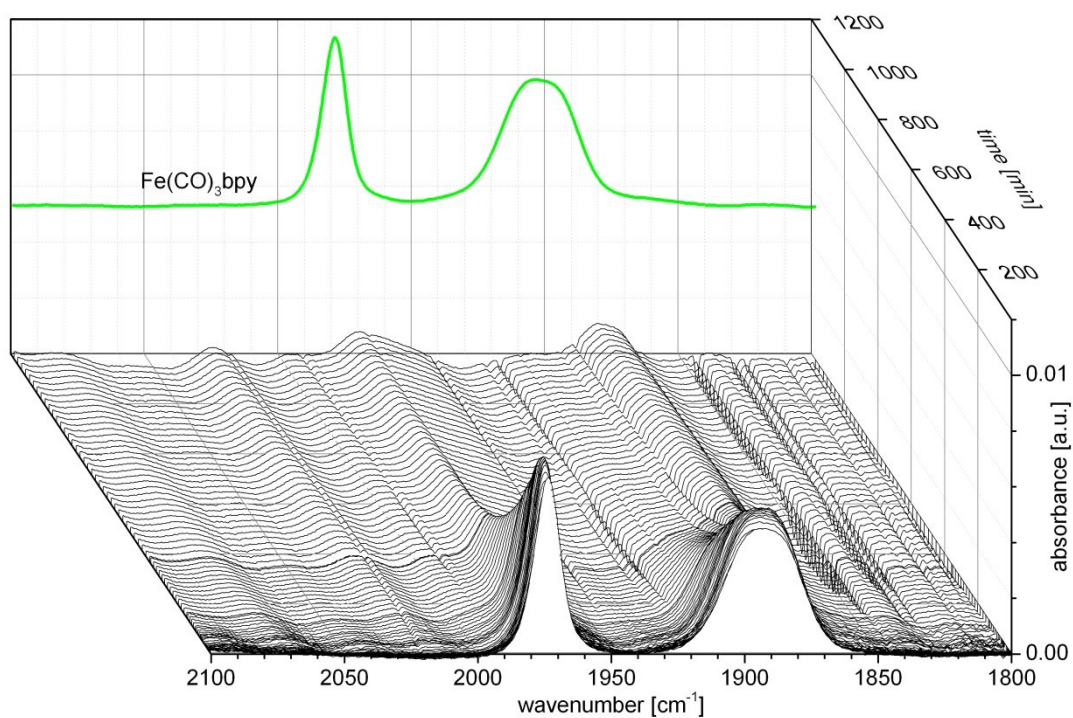

**Figure S6.** Operando FTIR spectra of a  $\text{CO}_2$ -saturated solution (NMP:TEOA = 5:1, v/v), containing  $[\text{Fe}(\text{bpy})(\text{CO})_3]$  ( $3 \mu\text{mol}$ ) and  $[\text{Ru}(\text{bpy})_3]\text{Cl}_2$  ( $25 \mu\text{mol}$ ) during irradiation with visible light (400-700 nm).

## References

- <sup>1</sup> M. Montalti, A. Credi, L. Prodi, T. Gandolfi, *Handbook of Photochemistry*; CRC: Boca Raton, FL, **2006**; pp 601-616.
- <sup>2</sup> T. Zell, P. Milko, K. L. Fillman, Y. Diskin-Posner, T. Bendikov, M. A. Iron, G. Leitius, Y. Ben-David, M. L. Neidig and D. Milstein, *Chem. Eur. J.* **2014**, *20*, 4403-4413.
